# Supplementary material for: Effect of a Multifactorial Intervention on Mortality in Type 2 Diabetes
Source: Atypon-hosted journal article supplement (doi:10.1056/nejmoa0706245), 2008-02-06
Supplement: nejm_gaede_580sa1.pdf [file nejm_gaede_580sa1.pdf]

## Supplementary Appendix

This appendix has been provided by the authors to give readers additional information about their work.

Supplement to: Gæde P, Lund-Andersen H, Parving H-H, Pedersen O. Effect of a multifactorial intervention on mortality in type 2 diabetes. *N Engl J Med* 2008;358:580-91.

**Supplementary Table.** Diabetic retinopathy was graded according to the six-level grading scale of the European Community–funded Concerted Action Programme into the Epidemiology and Prevention of Diabetes (EURODIAB) study, based on the principles of the Modified Airlie house classification scheme (18). The table shows allocated retinopathy levels and causative features.

| <b>Level</b> | <b>Retinopathy Features</b>                                                                                                                                                                                                                    |
|--------------|------------------------------------------------------------------------------------------------------------------------------------------------------------------------------------------------------------------------------------------------|
| Level 0      | No retinopathy                                                                                                                                                                                                                                 |
| Level 1      | Minimal non-proliferative retinopathy:<br>HMA = Grade 2-3 in 1 or 2 fields and/or<br>HE = Grade 2-4 in 1 or 2 fields                                                                                                                           |
| Level 2      | Moderate non-proliferative retinopathy:<br>HMA = Grade 4 in only 1 field<br>OR HMA = Grade 2-3 in 1 or 2 fields plus:<br>CSW = Grade 2-3 in 1 or 2 fields and/or<br>IRMA = Grade 2 in 1 or 2 fields and/or<br>VB = Grade 2 in 1 or 2 fields    |
| Level 3      | Severe non-proliferative (pre-proliferative):<br>HMA = Grade 4 in both fields<br>OR HMA = Grade 2-4 in 1 or 2 fields plus:<br>CSW = Grade 4 in 1 or 2 fields and/or<br>IRMA = Grade 3 in 1 or 2 fields and/or<br>VB = Grade 3 in 1 or 2 fields |
| Level 4      | Photocoagulated:<br>Scars of photocoagulation in any field                                                                                                                                                                                     |
| Level 5      | Proliferative retinopathy:                                                                                                                                                                                                                     |

Any of:

New vessels

Fibrous proliferations (disc or elsewhere)

Pre-retinal haemorrhage

Vitreous haemorrhage

---

HMA=Hemorrhages and microaneurysms; HE=Hard exudates; CWS=Cotton wool spots; IRMA=Intraretinal microvascular abnormalities; VB=Venous beading
